# Supplementary material
Source: publisher site journal article supplement (https://www.dovepress.com/article/238985)
Supplement: Supplementary file 1 [file get_supplementary_file.php]

**Supplementary information**


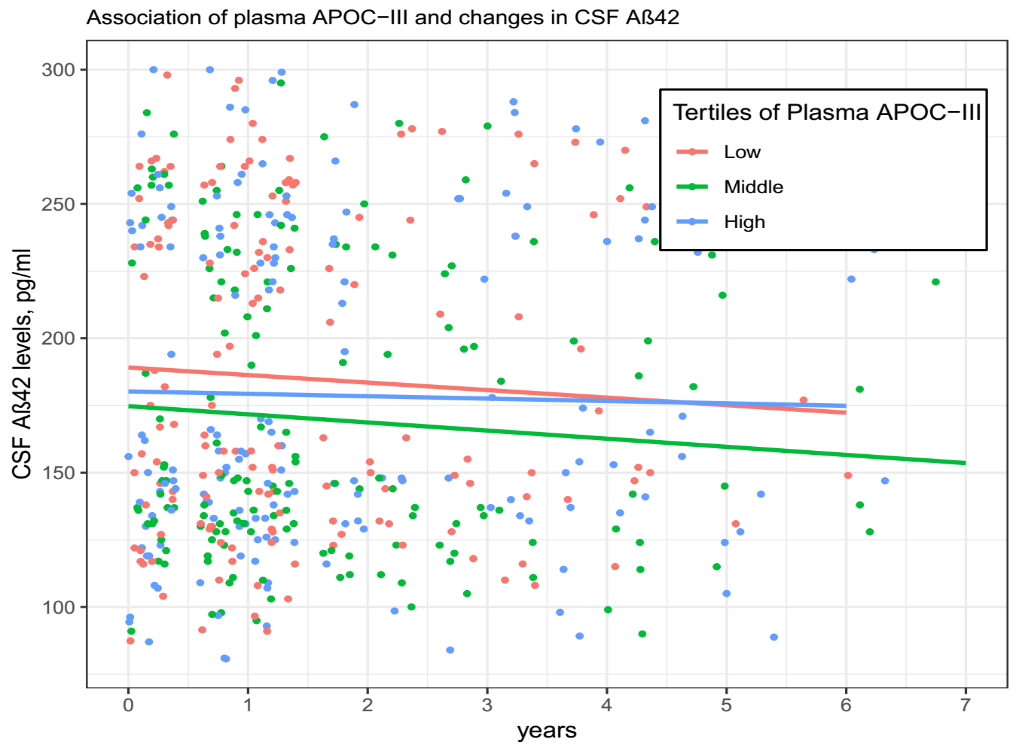


**Figure S1. Associations of baseline plasma APOC-III levels with changes in CSF AD pathologies.**


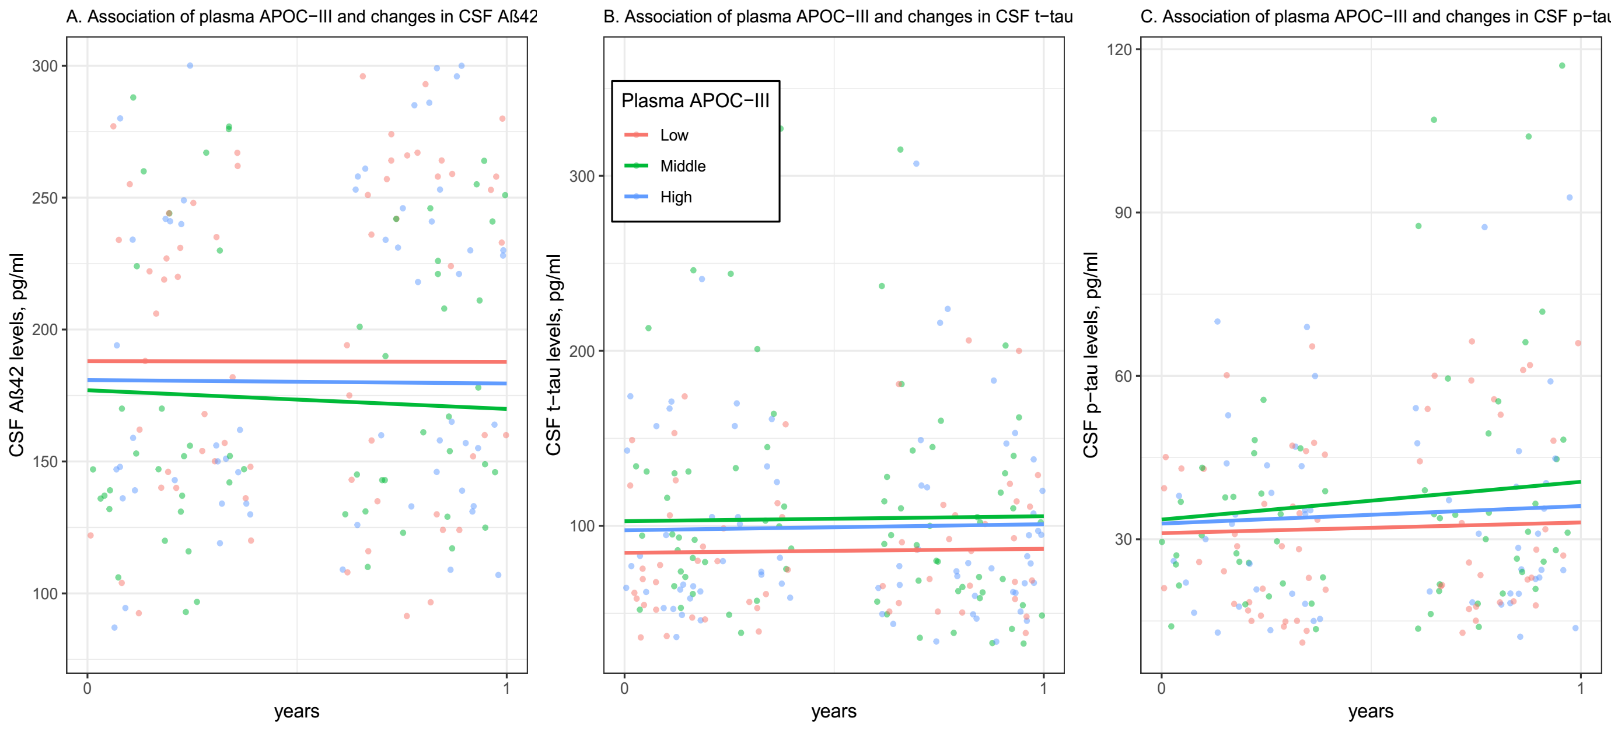


**Figure S2. Associations of baseline plasma APOC-III levels with changes in CSF AD pathologies over one year.**

**Table S1. Summary of linear mixed models examining the associations of plasma APOC-III with changes in CSF AD pathologies over a year**

| Dependent variable: CSF Aβ42 | | | |
| --- | --- | --- | --- |
| Predictors | Estimate | SE | P value |
| Middle APOC-III × time | -6.7985 | 3.0356 | **0.0251** |
| High APOC-III × time | -1.0215 | 3.0356 | 0.7365 |
| Dependent variable: CSF t-tau | | | |
| Predictors | Estimate | SE | P value |
| Middle APOC-III × time | 0.5415 | 3.3874 | 0.8730 |
| High APOC-III × time | 1.1908 | 3.3874 | 0.7252 |
| Dependent variable: CSF p-tau | | | |
| Predictors | Estimate | SE | P value |
| Middle APOC-III × time | 4.9641 | 2.4948 | **0.0467** |
| High APOC-III × time | 1.2523 | 2.4948 | 0.6147 |

Abbreviation: APOC-III: apolipoprotein C-III; Aβ42: β-amyloid 42; t-tau: total tau; p-tau: phosphorylated tau. Estimates are unstandardized values, representing the amount of change in each CSF AD biomarker per year. All linear mixed models were adjusted for age, education, sex and APOE4 genotype.
